# Supplementary material for: Late vertebral side effects in long-term survivors of irradiated childhood brain tumor
Source: PubMed Central journal article supplement (PMC6298650; doi:10.1371/journal.pone.0209193), 2018-12-18
Supplement: pone.0209193.s001.pdf [file pone.0209193.s001.pdf]

Height/depth ratio

| SDI | Th8   | L3    | Age at the study MR | Chemotherapy (1=yes, 0=no) | Spinal irradiation (1=yes, 0=no) |
|-----|-------|-------|---------------------|----------------------------|----------------------------------|
| 0   | 71,6  | 68,7  | 24                  | 1                          | 1                                |
| 0,5 | 58,6  | 56,8  | 29                  | 0                          | 0                                |
| 2,5 | 35,8  | 68,8  | 31                  | 1                          | 1                                |
| 5   | 42,6  | 79,5  | 33                  | 0                          | 0                                |
| 1   | 60,4  | 71,8  | 18                  | 1                          | 1                                |
| 1   | 73,5  | 68,2  | 43                  | 1                          | 0                                |
| 0   | 75    | 78,5  | 28                  | 0                          | 0                                |
| 0   | 66,7  | 66,3  | 30                  | 1                          | 0                                |
| 2   | 48,1  | 71,4  | 41                  | 0                          | 0                                |
| 0   | 66,9  | 88,9  | 33                  | 0                          | 0                                |
| 0   | 72,6  | 72,9  | 28                  | 1                          | 0                                |
| 3   | 37,3  | 67    | 43                  | 1                          | 1                                |
| 0,5 | 66,9  | 68,5  | 27                  | 1                          | 0                                |
| 0   | 66,4  | 64,5  | 19                  | 1                          | 1                                |
| 0   | 72,8  | 76,4  | 28                  | 1                          | 0                                |
| 0   | 77,9  | 93,5  | 32                  | 1                          | 0                                |
| 0   | 67,5  | 73,9  | 21                  | 1                          | 0                                |
| 1   | 50,1  | 62,5  | 30                  | 1                          | 1                                |
| 0   | 72,2  | 84,5  | 27                  | 0                          | 0                                |
| 0   | 72,3  | 75    | 35                  | 1                          | 1                                |
| 0,5 | 72,2  | 67,7  | 39                  | 1                          | 0                                |
| 0   | 71,5  | 65,6  | 26                  | 1                          | 1                                |
| 0   | 72,2  | 73,5  | 31                  | 1                          | 0                                |
| 0   | 73,9  | 90,9  | 37                  | 0                          | 0                                |
| 0   | 67,3  | 77,1  | 39                  | 0                          | 0                                |
| 0   | 70,11 | 75,78 | 33                  | 0                          | 0                                |
| 0   | 75    | 79,38 | 25                  | 1                          | 1                                |
| 0   | 60,5  | 72,67 | 38                  | 0                          | 0                                |
| 0   | 72,17 | 83,91 | 26                  | 1                          | 0                                |
| 0   | 67,13 | 80,8  | 27                  | 0                          | 0                                |
| 0   | 70,8  | 81    | 36                  | 0                          | 0                                |
| 0   | 82,29 | 83,14 | 18                  | 1                          | 1                                |

|     |       |        |    |   |   |
|-----|-------|--------|----|---|---|
| 0   | 65,66 | 71,17  | 27 | 1 | 1 |
| 0,5 | 58,62 | 61,17  | 21 | 1 | 1 |
| 0   | 73,76 | 79,69  | 23 | 1 | 1 |
| 0   | 71,89 | 68,28  | 26 | 1 | 1 |
| 0   | 65,8  | 81,61  | 26 | 1 | 1 |
| 0   | 72,46 | 94,03  | 24 | 0 | 0 |
| 0,5 | 68,18 | 65,56  | 37 | 1 | 0 |
| 0   | 70,42 | 76,37  | 29 | 0 | 1 |
| 1   | 61,29 | 86,69  | 27 | 0 | 0 |
| 0,5 | 70,99 | 75,45  | 28 | 0 | 0 |
| 0   | 64,14 | 68,7   | 26 | 1 | 1 |
| 0   | 62,5  | 64,23  | 28 | 0 | 1 |
| 0   | 64,13 | 67,95  | 21 | 1 | 1 |
| 0   | 66,02 | 77,02  | 32 | 1 | 0 |
| 0   | 76,19 | 92,09  | 24 | 1 | 0 |
| 0,5 | 64,89 | 60,3   | 24 | 1 | 1 |
| 0   | 75,71 | 64,61  | 19 | 1 | 1 |
| 0   | 52,36 | 70,73  | 29 | 0 | 0 |
| 0   | 80,35 | 108,84 | 24 | 0 | 0 |
| 0   | 80,62 | 92,56  | 30 | 1 | 0 |
| 0   | 64,83 | 74,88  | 20 | 1 | 0 |
| 4,5 | 56,32 | 66,25  | 19 | 1 | 1 |
| 0   | 71,43 | 82,08  | 31 | 1 | 0 |
| 0   | 70,45 | 82,41  | 23 | 0 | 0 |
| 0   | 72,48 | 76,97  | 36 | 0 | 0 |
| 0   | 61,81 | 70,52  | 25 | 1 | 1 |
| 0   | 68,33 | 61,19  | 20 | 0 | 1 |
| 0   | 74,3  | 64,45  | 25 | 1 | 1 |
| 0   | 64,6  | 69,55  | 18 | 0 | 0 |
| 0   | 77,71 | 85,1   | 16 | 0 | 0 |
| 0   | 71,59 | 80,58  | 16 | 1 | 1 |
| 0   | 63,65 | 80,85  | 23 | 1 | 0 |
| 0   | 66,67 | 72,78  | 32 | 0 | 0 |
| 0   | 73,39 | 77,2   | 24 | 1 | 1 |

|     |       |       |    |   |   |
|-----|-------|-------|----|---|---|
| 0,5 | 59    | 53,86 | 34 | 1 | 0 |
| 0   | 74,56 | 75,4  | 34 | 1 | 1 |
| 0   | 65,78 | 74,3  | 19 | 1 | 1 |
| 0   | 70,67 | 87,46 | 24 | 1 | 0 |
| 0,5 | 68,93 | 79,01 | 40 | 0 | 0 |
| 0   | 72,17 | 90,23 | 19 | 1 | 1 |
|     |       |       |    | 0 | 0 |
|     |       |       |    | 1 | 0 |

|                                         |                     |             |      | Z-score         |                |               |
|-----------------------------------------|---------------------|-------------|------|-----------------|----------------|---------------|
| Corticosteroid dose (g/m <sup>2</sup> ) | Sitting height (cm) | Height (cm) | BMI  | Right femur BMD | Left femur BMD | Right hip BMD |
| 24                                      | 68,6                | 168,5       | 25,1 | -0,9            | 0,1            | -0,5          |
| 1,02                                    | 98,3                | 196,9       | 40,8 |                 |                |               |
| 3,77                                    | 86,7                | 180,9       | 24,9 | -0,8            | -0,4           | -0,6          |
| 0,93                                    | 82,7                | 166,1       | 27   | -1              | -1,3           | -0,8          |
| 1,42                                    | 85,2                | 169,4       | 17,1 | -0,4            | -0,6           | -1,1          |
| 1,72                                    | 89,9                | 183,3       | 22,6 | -1,6            | -1,6           | -1,5          |
| 2,68                                    | 84                  | 169,1       | 28,8 | -0,4            | -0,8           | -0,6          |
| 6,77                                    | 84,6                | 172,6       | 22,3 | -1,7            | -2,5           | -1,8          |
| 7,98                                    | 82,3                | 173,5       | 26   | -2,9            | -3,4           | -3,3          |
| 0,84                                    | 85,7                | 168,2       | 35   | -0,8            | -0,7           | -1,1          |
| 17,25                                   | 72,6                | 147,2       | 21,8 | -1,7            | -1,4           | -1,5          |
| 2,28                                    | 77,5                | 157,8       | 21,9 | -1,2            | -1,9           | -1            |
| 3,05                                    | 82,3                | 176,2       | 23,4 | -1,4            | -0,1           | -0,9          |
| 9,03                                    | 78,7                | 163,2       | 27,5 | -0,7            | -1,1           | -1,2          |
| 0                                       | 80,5                | 164,2       | 22,1 | -2,5            | -2,4           | -2,2          |
| 0,52                                    | 77,3                | 150,7       | 21,4 | 0,2             | 0,2            | 0,8           |
| 5,52                                    | 81,2                | 164,3       | 15   | -0,4            | -1             | -0,1          |
| 1,64                                    | 83,3                | 173,4       | 33,9 | -1,3            | -1,4           | -0,7          |
| 1,98                                    | 78,2                | 146,4       | 32,4 | -0,6            | -0,4           | 0             |
| 0,93                                    | 89                  | 183,9       | 18,6 | -1,1            | -1             | -0,9          |
| 0                                       |                     | 142         | 11,5 | -0,7            | -1,2           | -0,4          |
| 6,4                                     | 73,5                | 148,4       | 25,1 | -2,6            | -3,3           | -2,5          |
| 3,68                                    | 81                  | 157,9       | 30,3 | -1,6            | -1,2           | 0,1           |
| 0,48                                    | 78,8                | 152,9       | 27,6 | 0,1             | 0,5            | 0,5           |
| 1,49                                    | 85,5                | 166,3       | 25,7 | -0,3            | -0,1           | -0,9          |
| 1,55                                    | 86,2                | 169,2       | 23,2 | -1,8            | -1,4           | -1            |
| 5,68                                    | 75,5                | 153,7       | 29,2 | -2              | -1,9           | -2,1          |
| 0,62                                    | 88,6                | 165         | 35,4 | 0,8             | 0,6            | 1,3           |
| 7,31                                    | 88                  | 148,4       | 34,8 | 0,4             | -0,2           | 1,1           |
| 1,49                                    | 89,7                | 168,4       | 24,7 | -1,8            |                | -1,5          |
| 0                                       | 93,4                | 181,2       | 21,8 | -0,5            | 0,1            | -0,3          |
| 8,15                                    | 80,6                | 160,8       | 18   | -1,1            | -1             | -1,4          |

|       |      |       |      |      |      |      |
|-------|------|-------|------|------|------|------|
| 11,4  | 95,1 | 177,2 | 28,8 | -1,6 | -1,6 | -1,3 |
| 17,56 | 84,7 | 174,5 | 27,5 | -0,8 | -0,7 | -0,3 |
| 12,75 | 81,6 | 163   | 19   | -1,3 | -1,2 | -1,1 |
| 7,16  | 83,2 | 159,5 | 22,1 | -0,2 | -0,1 | -0,1 |
| 3,23  | 75,1 | 156,2 | 29,8 | -1,5 | 0    | -1,3 |
| 0     | 89,1 | 168,3 | 24,7 | -0,6 | -0,1 | 0,2  |
| 2,5   | 88   | 163,7 | 26,3 | 0,2  | 0,3  | 1,1  |
| 1,01  | 89,1 | 169   | 29,2 | -0,4 | 0,2  | -0,6 |
| 0     | 91,1 | 173   | 29,9 | -1,7 | -1,1 | -2   |
| 0,12  | 94,2 | 176,6 | 23,2 | -2,5 | -2,3 | -2   |
| 8,17  | 88,8 | 173,6 | 18,9 | -0,8 | -0,6 | -0,5 |
| 0,85  | 90,9 | 173,5 | 31,9 | -0,2 | 0    | -0,1 |
| 3,52  | 81,4 | 159,9 | 20,7 | -1,9 | -1,9 | -2   |
| 4,23  | 92,4 | 174,8 | 23,2 | -1   | -1   | -1   |
| 17,38 |      | 136   | 19   | -2,5 | -1,7 | -3,3 |
| 17,53 | 74,7 | 160,2 | 20,3 | 0    | -0,4 | -1   |
| 0,56  | 84,5 | 156,1 | 40,1 |      |      |      |
| 0     | 97   | 174,3 | 39,5 | 0,9  | 0,9  | 0,8  |
| 2,52  | 90,9 | 170,2 | 22,5 | -0,9 | -1   | -0,7 |
| 0,58  | 87,4 | 168,2 | 27,3 | 0,6  | 0,6  | 0,3  |
| 4,29  | 87,4 | 174   | 30,8 | 0,4  | 0,7  | -0,1 |
| 0,22  | 85,1 | 170,8 | 36,2 | -0,2 | 0,7  | 0,6  |
| 3,63  | 91   | 171,7 | 25,7 | -1,7 | -1,1 | -1,4 |
| 0,2   | 89   | 169,9 | 27,1 | 1    | 1,6  | 1,1  |
| 0,1   | 93,8 | 172,6 | 25,3 | -0,6 | -0,9 | -1   |
| 11,25 | 82,7 | 167,6 | 27,4 | -0,5 | -0,9 | -0,2 |
| 1,06  | 84,4 | 163,9 | 21,5 | -1,9 | -1,8 | -1,6 |
| 1,12  | 87   | 169,8 | 17,5 | -1,3 | -1,9 | -1,4 |
| 1,27  | 87,8 | 166,4 | 19,6 | -2,4 | -2,8 | -2   |
| 0,13  | 86,8 | 165,9 | 18,5 | -1   | -0,5 | -1,1 |
| 1,46  | 74,5 | 157,2 | 17,4 | -2,6 | -3,1 | -3,1 |
| 0,65  | 77   | 165,2 | 17,6 | -0,9 | -1,2 | -1   |
|       | 88,7 | 163,2 | 35   | -0,2 | -0,3 | 0,2  |
| 2,76  | 81,7 | 166,4 | 25   | 0,5  | 0,1  | 0,1  |

|      |      |       |      |      |      |      |
|------|------|-------|------|------|------|------|
| 0    | 91,2 | 174,2 | 25,2 |      | -0,7 |      |
| 7,5  | 78,9 | 159,9 | 19,3 | -1,3 | -1,7 | -1,3 |
| 0,88 | 81,3 | 166,5 | 19,5 | 0,4  | 0,4  | 0,2  |
| 0,38 | 94,6 | 180,3 | 20,9 | -0,4 | -0,3 | -0,1 |
|      |      | 151,1 | 43,5 | 0,6  | 0,8  | 2,3  |
| 1,87 | 87,1 | 164,1 | 17,4 | -1,8 | -1,4 | -2,4 |
| 1,24 | 86,5 | 176,2 | 22,5 | -1,2 | -0,7 | -0,9 |
| 12   | 88,5 | 163,5 | 28,2 | -1   | -0,9 | -0,8 |

| Left hip BMD | Lumbar spine BMD | Vertebral fracture (1=yes) | Gender (1=male, 0=female) | Treatment age | Diagnosis age | Th4 |
|--------------|------------------|----------------------------|---------------------------|---------------|---------------|-----|
| 0            | -1,3             | 0                          | 1                         | 3             | 3             | 0,0 |
|              |                  | 0                          | 1                         | 12            | 11            | 0,0 |
| -0,8         | 0,7              | 0                          | 1                         | 15            | 15            | 0,0 |
| -0,6         | 0,7              | 0                          | 1                         | 15            | 15            | 0,0 |
| -1,1         | -0,7             | 0                          | 1                         | 12            | 12            | 0,0 |
| -1,5         | -1,6             | 1                          | 1                         | 15            | 15            | 1,0 |
| -0,8         | 1                | 0                          | 1                         | 4             | 4             | 0,0 |
| -2,2         | -1,8             | 0                          | 1                         | 5             | 5             | 0,0 |
| -3,6         | -3,9             | 1                          | 1                         | 11            | 11            | 0,5 |
| -0,8         | -1,5             | 0                          | 0                         | 15            | 15            | 0,0 |
| -1,3         | -0,9             | 0                          | 0                         | 4             | 4             | 0,0 |
| -1,7         | -0,3             | 1                          | 0                         | 14            | 14            | 0,0 |
| -0,4         | -0,6             | 0                          | 1                         | 12            | 12            | 0,0 |
| -1,2         | -1,4             | 0                          | 1                         | 8             | 8             | 0,0 |
| -1,9         | -1,2             | 0                          | 1                         | 2             | 2             | 0,0 |
| 0,8          | 0,5              | 0                          | 0                         | 4             | 4             | 0,0 |
| -0,2         | 0,2              | 0                          | 1                         | 6             | 5             | 0,0 |
| -0,6         | -1,4             | 0                          | 1                         | 9             | 8             | 0,0 |
| 0,3          | 0,8              | 0                          | 0                         | 6             | 6             | 0,0 |
| -1           | -0,7             | 0                          | 1                         | 15            | 15            | 0,0 |
| -0,4         | 0,9              | 0                          | 0                         | 8             | 8             | 0,0 |
| -3           | -0,2             | 0                          | 1                         | 5             | 4             | 0,0 |
| 0,3          | 0,3              | 0                          | 0                         | 5             | 5             | 0,0 |
| 0,5          | 0,4              | 0                          | 0                         | 15            | 15            | 0,0 |
| -0,4         | -0,2             | 0                          | 0                         | 15            | 15            | 0,0 |
| -1           | -1               | 0                          | 1                         | 5             | 5             | 0,0 |
| -2,4         | -1,1             | 0                          | 0                         | 2             | 2             | 0,0 |
| 1,4          | 0,9              | 0                          | 0                         | 12            | 12            | 0,0 |
| 1,1          | 0,4              | 0                          | 0                         | 5             | 4             | 0,0 |
|              | -2               | 0                          | 1                         | 4             | 4             | 0,0 |
| 0            | 0,1              | 0                          | 1                         | 14            | 14            | 0,0 |
| -1,3         | -2,4             | 0                          | 0                         | 8             | 8             | 0,0 |

|      |      |   |   |    |    |     |
|------|------|---|---|----|----|-----|
| -1,3 | -1,1 | 0 | 1 | 5  | 5  | 0,0 |
| -0,4 | -0,6 | 0 | 1 | 1  | 1  | 0,0 |
| -1,5 | -1,7 | 0 | 1 | 4  | 4  | 0,0 |
| -0,1 | -0,6 | 0 | 1 | 10 | 10 | 0,0 |
| -1,1 | -0,9 | 0 | 0 | 10 | 10 | 0,0 |
| 0,4  | -1   | 0 | 1 | 8  | 6  | 0,0 |
| 1,5  | 0,6  | 0 | 0 | 13 | 13 | 0,0 |
| -0,1 | 1    | 0 | 1 | 8  | 8  | 0,0 |
| -0,8 | -1,7 | 0 | 1 | 5  | 5  | 0,0 |
| -2,1 | -1,4 | 0 | 1 | 7  | 4  | 0,0 |
| -0,6 | -0,3 | 0 | 1 | 4  | 4  | 0,0 |
| -0,1 | -0,4 | 0 | 1 | 12 | 11 | 0,0 |
| -2   | -2,1 | 0 | 0 | 11 | 11 | 0,0 |
| -1,1 | -1   | 0 | 1 | 9  | 9  | 0,0 |
| -2,6 | -2,6 | 0 | 0 | 1  | 1  | 0,0 |
| -0,9 | -2,4 | 0 | 1 | 6  | 6  | 0,0 |
|      |      | 0 | 0 | 6  | 6  | 0,0 |
| 0,9  | -0,9 | 0 | 1 | 8  | 8  | 0,0 |
| -0,3 | -2,1 | 0 | 1 | 2  | 1  | 0,0 |
| 0,7  | -1   | 0 | 0 | 11 | 10 | 0,0 |
| 0,1  | -0,4 | 0 | 0 | 5  | 1  | 0,0 |
| 0,8  | -0,6 | 0 | 1 | 14 | 14 | 0,0 |
| -1   | -1,3 | 0 | 1 | 11 | 11 | 0,0 |
| 1,3  | 0,6  | 0 | 0 | 9  | 8  | 0,0 |
| -0,9 | -0,9 | 0 | 1 | 8  | 6  | 0,0 |
| 0    | -0,1 | 0 | 1 | 2  | 2  | 0,0 |
| -1,6 | -1,5 | 0 | 1 | 3  | 3  | 0,0 |
| -1,9 | -0,7 | 0 | 1 | 10 | 10 | 0,0 |
| -2,3 | -3   | 0 | 1 | 10 | 9  | 0,0 |
| -0,7 | -1,1 | 0 | 1 | 7  | 4  | 0,0 |
| -3,7 | -4,2 | 0 | 1 | 3  | 1  | 0,0 |
| -1,2 | -1,8 | 0 | 1 | 5  | 5  | 0,0 |
| 0,5  | 0,8  | 0 | 0 | 11 | 10 | 0,0 |
| 0    | 0,1  | 0 | 0 | 10 | 10 | 0,0 |



|      |      |   |   |    |    |     |
|------|------|---|---|----|----|-----|
| 0,1  | -0,6 | 0 | 1 | 13 | 13 | 0,0 |
| -1,7 | -2,1 | 0 | 0 | 11 | 11 | 0,0 |
| 0,2  | -1,5 | 0 | 1 | 11 | 11 | 0,0 |
| 0    | -1,2 | 0 | 1 | 13 | 13 | 0,0 |
| 1,8  | 0,8  | 0 | 0 | 7  | 4  | 0,0 |
| -2,2 | -2,9 | 0 | 0 | 10 | 10 | 0,0 |
| -0,7 | 0,4  |   | 1 | 10 | 8  |     |
| -0,5 | -0,8 |   | 0 | 6  | 5  |     |







| Female Height SDS | Male Height | Male Height SDS |
|-------------------|-------------|-----------------|
| 0,1               | 168,5       | -2              |
| -3,8              | 196,9       | 2,6             |
| -1,8              | 180,9       | 0               |
| -3,1              | 166,1       | -2,4            |
| -3,9              | 169,4       | -1,7            |
| -4,7              | 183,3       | 0,4             |
| -1,8              | 169,1       | -1,9            |
| -2,7              | 172,6       | -1,3            |
| -0,2              | 173,5       | -1,2            |
| -2,5              | 176,2       | -0,7            |
| -0,5              | 163,2       | -2,8            |
| -3,5              | 164,2       | -2,7            |
| -1,1              | 164,3       | -2,7            |
| -2,1              | 173,4       | -1,2            |
| -0,7              | 183,9       | 0,5             |
| -0,7              | 148,4       | -5,3            |
| -1,4              | 176,2       | -0,7            |
| -5,8              | 169,2       | -1,8            |
| -2                | 168,4       | -2              |
| 0,1               | 181,2       | 0,1             |
| 1,2               | 177,2       | -0,6            |
| 0,4               | 174,5       | -1              |
| -0,8              | 163         | -2,9            |
| -0,2              | 159,5       | -3,5            |
| -1,4              | 168,3       | -2              |
| -3                | 169         | -1,9            |
| -0,6              | 173         | -1,3            |
|                   | 176,6       | -0,7            |
|                   | 173,6       | -1,2            |
|                   | 173,5       | -1,2            |
|                   | 174,8       | -1              |
|                   | 160,2       | -3,3            |
